# Supplementary material
Source: publisher figshare collection journal article supplement (https://sage.figshare.com/ndownloader/files/24154589)
Supplement: Supplementary file 1 [file 24154589]

## Appendix 1.

*Hello, my name is \_\_\_\_\_ (first name only). Would you be willing to participate in a brief 3-5-minute survey regarding firearm access and safety in relation to your child? You and your child who is greater than 6 years old will both need to give verbal consent to agree to participate. This survey is completely anonymous. You can agree to participate or not agree to participate this will not affect your child's care in the Emergency Department today. You will be asked to step outside of the room while your child is completing the survey to ensure privacy/confidentiality for both of you while completing the survey. I will stay in here to assist your child with the survey completion. Do you have any questions? Do you agree to participate in this study?*
